## Erratum

**Scali, C., Catteruccia, F., Li, Q. and Crisanti, A. (2005).** Identification of sex-specific transcripts of the *Anopheles gambiae* *doublesex* gene. *J. Exp. Biol.* **208**, 3701-3709.

In the online PDF and full-text versions of this article, Fig. 3 has been published in an incomplete form. The complete figure is shown below.

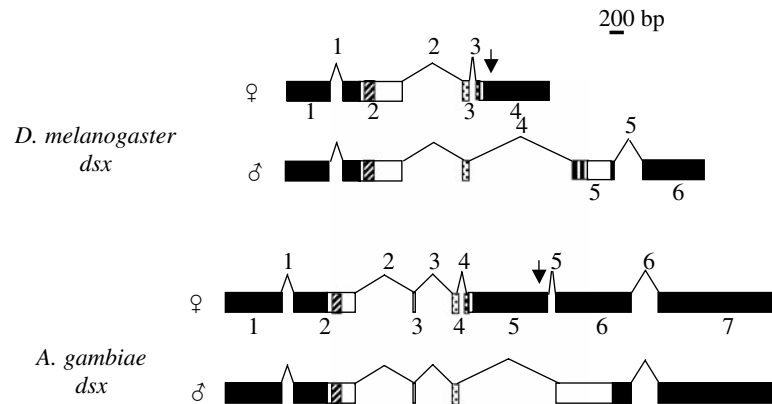

This error does not occur in the print version of this article.

We apologise sincerely to authors and readers for this mistake.
